# Supplementary material for: Communicating BRCA research results to patients enrolled in international clinical trials: lessons learnt from the AGO-OVAR 16 study
Source: PubMed Central journal article supplement (PMC5073453; doi:10.1186/s12910-016-0144-y), 2016-10-21
Supplement: 12910_2016_144_MOESM1_ESM.pdf [file 12910_2016_144_MOESM1_ESM.pdf]

**Table S1: Names and affiliations of local institutional review boards and ethics committees that approved AGO-OVAR 16.**

| Country                                                                                                                                    | Institutional review board/ethics committee name and affiliation                                                                                                                                                       |
|--------------------------------------------------------------------------------------------------------------------------------------------|------------------------------------------------------------------------------------------------------------------------------------------------------------------------------------------------------------------------|
| Australia                                                                                                                                  | Bellberry Human Research Ethics Committee, 229 Greenhill Road, Dulwich South Australia, 5065, Australia                                                                                                                |
|                                                                                                                                            | Cabrini Institute Human Research Ethics Committee, 183 Wattletree Road, Malvern, Victoria, 3144, Australia                                                                                                             |
|                                                                                                                                            | Cancer Institute New South Wales Clinical Research Ethics Committee, Australian Technology Park, Biomedical Building, Suite 101, 1 Central Avenue (off Garden Road), Eveleigh, New South Wales, 2015, Australia        |
|                                                                                                                                            | Human Research Ethics Office, Level 7, Block 7, Royal Brisbane and Women's Hospital, Australia                                                                                                                         |
|                                                                                                                                            | Mercy Health Human Research Ethics Committee, Mercy Hospital for Women, 163 Studley Road, Heidelberg, 3084, Australia                                                                                                  |
|                                                                                                                                            | Royal Adelaide Hospital Research Ethics Committee, Level 3, Hanson Institute, North Terrace, Adelaide, South Australia, 5000, Australia                                                                                |
|                                                                                                                                            | Royal Women's Hospital Human Research Ethics Committee, The Royal Women's Hospital, Corner Grattan Street & Flemington Road, Parkville, Victoria, 3052, Australia                                                      |
|                                                                                                                                            | Sir Charles Gairdner Group Human Research Ethics Committee, Sir Charles Gairdner Hospital, Hospital Avenue, Nedlands, Western Australia, 6009, Australia                                                               |
| Tasmania Health and Medical Human Research Ethics Committee, Research House, Sandy Bay Campus, University of Tasmania, Tasmania, Australia |                                                                                                                                                                                                                        |
| Austria                                                                                                                                    | Ethikkommission der Med. Universität Innsbruck, Geschäftsstelle, Innrain 43, Innsbruck, A-6020, Austria                                                                                                                |
| Belgium                                                                                                                                    | Commissie Medische Ethiek-toetsingcommissie, UZ Leuven, Campus Gasthuisberg E330, Herestraat 49, Leuven, 3000, Belgium                                                                                                 |
| China                                                                                                                                      | Ethics Committee of Beijing 301 PLA Hospital, NO.28, Fu Xing Avenue, Haidian District, Beijing, 100853, China                                                                                                          |
|                                                                                                                                            | Ethics Committee of Cancer Hospital of Jiangsu Province, No.42 Baiziting, Nanjing, Jiangsu, 210009, China                                                                                                              |
|                                                                                                                                            | Ethics Committee of Cancer Hospital, CAMS and PUMC, No.17, Pan Jia Yuan Nan Li, Chaoyang District, Beijing, 100021, China                                                                                              |
|                                                                                                                                            | Ethics Committee of Obstetrics and Gynecology Hospital Of Fudan University, Room 308 3F No.506 Fangxie Road, Huangpu District, Shanghai City, 200011, China                                                            |
|                                                                                                                                            | Ethics Committee of Peking University People's Hospital, Peking University People's Hospital, No.11, Xizhimen South Avenue, Xicheng District, Beijing, 100044, China                                                   |
|                                                                                                                                            | Ethics Committee of Shengjing Hospital of China Medical University, No.36, Sanhao Street, Heping District, Shenyang City, Liaoning Province, 110004, China                                                             |
|                                                                                                                                            | Ethics Committee of Tianjin Cancer Hospital, 2/F, Cancer Institute, No.47, Binshui Dao, Tiyuan Bei, Hexi District, Tianjin, 300060, China                                                                              |
|                                                                                                                                            | Ethics Committee of Beijing Cancer Hospital, No.52, Fu Cheng Road, Haidian District, Beijing, 100141, China                                                                                                            |
|                                                                                                                                            | Ethics Committee of Cancer Hospital Affiliated to Fudan University, No.270, Dong An Road, Shanghai, 200032, China                                                                                                      |
|                                                                                                                                            | Ethics Committee of Women's Hospital of Zhejiang University, No.1, Xueshi Road, Hangzhou, Zhejiang Province, 310006, China                                                                                             |
|                                                                                                                                            | Ethics Committee of Zhejiang Cancer Hospital, No.38, Guangji Road, Banshan Bridge, Hangzhou, 310022, China                                                                                                             |
|                                                                                                                                            | Ethics Committee of Sun Yat-Sen University Cancer Center, 651, Dongfeng East Road, Guangzhou, 510060, China                                                                                                            |
| Shandong University Qi Lu Hospital, No.107, Wenhua West Road, Li Xia District, Jinan, Shandong, 250012, China                              |                                                                                                                                                                                                                        |
| Denmark                                                                                                                                    | De Videnskabetiske Komiteer i Region Hovedstaden, Kongens Vaenge 2, Hilleroed, 3400, Denmark                                                                                                                           |
| France                                                                                                                                     | CPP Sud-Ouest et Outre Mer III, Service de Pharmacologie Clinique, Bat. 1A, Hopital Pellegrin, Place Amelie Raba Leon, Bordeaux Cedex, 33076, France                                                                   |
| Germany                                                                                                                                    | Ethikkommission der Landesärztekammer Hessen, Im Vogelgesang 3, Frankfurt, 60488, Germany                                                                                                                              |
| Hong Kong                                                                                                                                  | Institutional Review Board of the University of Hong Kong/Hospital Authority Hong Kong West Cluster, Queen Mary Hospital, Room 901, Administration Block, 102 Pokfulam Road, Hong Kong, Hong Kong                      |
|                                                                                                                                            | Research Ethics Committee(Kowloon Central/Kowloon East), Queen Elizabeth Hospital, 30 Gascoigne Road, Kowloon, Hong Kong                                                                                               |
| Ireland                                                                                                                                    | Clinical Research Ethics Committee of the Cork Teaching Hospital, Lancaster Hall, 6 Little Hanover Street, Cork, Ireland                                                                                               |
| Italy                                                                                                                                      | Comitato di Bioetico, Ospedale S. Giovanni Calibita Fatebenefratelli di Roma, Isola Tiberina, 39, Roma, Lazio, 00186, Italy                                                                                            |
|                                                                                                                                            | Comitato Etico Azienda Spedali Civili di Brescia, Piazzale Spedali Civili, 1, Brescia, Lombardia, 25123, Italy                                                                                                         |
|                                                                                                                                            | Comitato Etico Centro di Riferimento Oncologico, Istituto Nazionale Tumori (IRCCS) di Aviano, Segreteria Scientifico-Amministrativa, Via Pedemontana Occidentale, 12, Aviano (PN), Friuli-Venezia-Giulia, 33081, Italy |
|                                                                                                                                            | Comitato Etico dell' Azienda Ospedaliera della Valtellina e della Valchiavenna, Via Stelvio, 25, Sondrio, Lombardia, 23100, Italy                                                                                      |
|                                                                                                                                            | Comitato Etico dell' Azienda Ospedaliera San Carlo, Via Potito Petrone, Potenza, Basilicata, 85100, Italy                                                                                                              |
|                                                                                                                                            | Comitato Etico dell' Indipendente Locale, Azienda Ospedaliera Universitaria Consorziata, Segreteria Scientifico-Amministrativa, Piazza Giulio Cesare, 11, Bari, Puglia, 70124, Italy                                   |
|                                                                                                                                            | Comitato Etico dell' Istituto di Ricovero e Cura a Carattere Scientifico, Ospedale Maggiore Policlinico Mangiagalli e Regina Elena, Via Francesco Sforza, 28, Milano, Lombardia, 20122, Italy                          |
|                                                                                                                                            | Comitato Etico dell' Azienda Ospedaliera Ospedali Riuniti Villa Sofia-Cervello, Via Trabucco 180, Palermo, Sicilia, 90146, Italy                                                                                       |
|                                                                                                                                            | Comitato Etico dell' Azienda Ospedaliera, San G. Moscati, Contrada Amoretta, Città Ospedaliera, Pal. Uffici, Avellino, Campania, 83100, Italy                                                                          |
|                                                                                                                                            | Comitato Etico della AUSL di Bologna, c/o Dipartimento Farmaceutico, Via Gramsci, 12, Bologna, Emilia-Romagna, 40121, Italy                                                                                            |
|                                                                                                                                            | Comitato Etico della Fondazione Centro S. Raffaele del Monte Tabor (Istituto di Ricovero e Cura a Carattere Scientifico) di Milano, Dipartimento Medicina Interna, Via Olgettina 60, Milano, Lombardia, 20132, Italy   |
|                                                                                                                                            | Comitato Etico Della Provincia Di Modena, Via Largo del Pozzo 71, Modena, 411204, Italy                                                                                                                                |
|                                                                                                                                            | Comitato Etico dell' Azienda Ospedaliera San Gerardo di Monza, Via Pergolesi, 33, Monza, Lombardia, 20052, Italy                                                                                                       |
|                                                                                                                                            | Comitato Etico dell' Azienda Ospedaliera Sant'Anna di Como, Segreteria Scientifico-Amministrativa, Via Napoleona, 60, Como, Lombardia, 22100, Italy                                                                    |

|                                                                                                                                                                     |                                                                                                                                                                                                                                           |
|---------------------------------------------------------------------------------------------------------------------------------------------------------------------|-------------------------------------------------------------------------------------------------------------------------------------------------------------------------------------------------------------------------------------------|
| Italy                                                                                                                                                               | Comitato Etico delle Azinede Sanitarie dell'Umbria di Perugia, via della Rivoluzione,I, ellera di Corciano, Perugia, 06070, Italy                                                                                                         |
|                                                                                                                                                                     | Comitato Etico dell'Istituto Europeo di Oncologia, Via Ripamonti 435, Milano, 20141, Italy                                                                                                                                                |
|                                                                                                                                                                     | Comitato Etico dell'Universita' Cattolica del Sacro Cuore -Policlinico Gemelli, Largo Agostino Gemelli, n.8, Roma, Lazio, 00168, Italy                                                                                                    |
|                                                                                                                                                                     | Comitato Etico di Area Vasta Romagna di Cesena, Piazza Leonardo Sciascia, 111/2, Cesena (FC), Emilia-Romagna, 47023, Italy                                                                                                                |
|                                                                                                                                                                     | Comitato Etico I.FO.Instituto Fisioterapici Ospitalieri Istituto di Ricovero e Cura a Carattere Scientifico Regina Elena, Istituto di Ricovero e Cura a Carattere Scientifico San Gallicano, Via E.Chianesi 53, Roma, Lazio, 00144, Italy |
|                                                                                                                                                                     | Comitato Etico Indipendente dell' Azienda Ospedaliero-Universitaria di Bologna, Policlinico Sant'Orsola Malpighi, Via Albertoni 15, Padiglione 3, Bologna, Emilia-Romagna, 40138, Italy                                                   |
|                                                                                                                                                                     | Comitato Etico Indipendente Istituto Nazionale per lo Studio e la Cura dei Tumori 'Fondazione Giovanni Pascale' (IRCCS), Via Mariano Semmola, 3, Napoli, Campania, 80131, Italy                                                           |
|                                                                                                                                                                     | Comitato Etico Indipendente, Fondazione Istituto di Ricovero e Cura a Carattere Scientifico Istituto dei Tumori, Segreteria Scientifico-Amministrativa, Via Venezian, 1, Milano, Lombardia, 20133, Italy                                  |
|                                                                                                                                                                     | Comitato Etico Interaziendale delle ASO Ospedale Infantile Regina Margherita Sant Anna e Ordine Mauriziano di Torino, Corso Spezia, 60, Torino, Piemonte, 10126, Italy                                                                    |
|                                                                                                                                                                     | Comitato Etico Istituto Europeo di Oncologia, Via Ripamonti, 435, Milano, Lombardia, 20141, Italy                                                                                                                                         |
|                                                                                                                                                                     | Comitato Etico Ospedale di Circolo, Viale Borri, Varese, 57-21100, Italy                                                                                                                                                                  |
|                                                                                                                                                                     | Comitato Etico per la Sperimentazione Clinica della Provincia di Vicenza, Ospedale San Bortolo, Via Rodolfi, 37, Vicenza, Veneto, 36100, Italy                                                                                            |
|                                                                                                                                                                     | Comitato Etico per le Attività Biomediche -Università degli Studi di Napoli Federico II, Segreteria Scientifico-Amministrativa, Via Pansini, 5, Napoli, Campania, 80131, Italy                                                            |
|                                                                                                                                                                     | Comitato Etico Provinciale di Reggio Emilia, Segreteria Scientifico-Amministrativa, Viale Risorgimento, 57, Reggio Emilia, Emilia-Romagna, 42100, Italy                                                                                   |
| Commissione Etico-Scientifica dell'Ospedale Niguarda Cà Granda, Segreteria Scientifico-Amministrativa, Piazza Ospedale Maggiore, 3, Milano, Lombardia, 20162, Italy |                                                                                                                                                                                                                                           |
| Etico dell'Universita' Cattolica del S. Cuore -Policlinico Gemelli, Largo Gemelli, 8, Roma, Lazio, 168, Italy                                                       |                                                                                                                                                                                                                                           |
| Japan                                                                                                                                                               | Institutional Review Board, Hiroshima University Hospital, 1-2-3, Kasumi, Minami-ku, Hiroshima-city, Hiroshima, 734-8551, Japan                                                                                                           |
|                                                                                                                                                                     | Institutional Review Board, Hokkaido University Hospital, North 14, West 5, Kita-ku, Sapporo-shi, Hokkaido, 060-8648, Japan                                                                                                               |
|                                                                                                                                                                     | Institutional Review Board, Kagoshima City Hospital, 20-17, Kajiya-cho, Kagoshima-shi, Kagoshima, 892-8580, Japan                                                                                                                         |
|                                                                                                                                                                     | Institutional Review Board, Keio University Hospital, 35, Shinanomachi, Shinjuku-ku, Tokyo, 160-8582, Japan                                                                                                                               |
|                                                                                                                                                                     | Institutional Review Board, Kinki University Hospital, 377-2, Ohnohigashi, Osakasayama-city, Osaka, 589-8511, Japan                                                                                                                       |
|                                                                                                                                                                     | Institutional Review Board, National Cancer Center Hospital, 5-1-1, Tsukiji, Chuo-ku, Tokyo, 104-0045, Japan                                                                                                                              |
|                                                                                                                                                                     | Institutional Review Board, National Hospital Organization Kyushu Cancer Center, 3-1-1, Notame, Minami-ku, Fukuoka-city, Fukuoka, 811-1395, Japan                                                                                         |
|                                                                                                                                                                     | Institutional Review Board, National Hospital Organization, Shikoku Cancer Center, 160, Kou, Minamiumemotomachi, Matsuyama-shi, Ehime, 791-0280, Japan                                                                                    |
|                                                                                                                                                                     | Institutional Review Board, Saitama Medical University International Medical Center, 1397-1, Yamane, Hidaka-city, Saitama, 350-1298, Japan                                                                                                |
|                                                                                                                                                                     | Institutional Review Board, The Jikei University School of Medicine, 3-19-18, Nishishinbashi, Minato-ku, Tokyo, 105-8471, Japan                                                                                                           |
|                                                                                                                                                                     | Institutional Review Board, Tohoku University Hospital, 1-1, Seiryu-machi, Aoba-ku, Sendai-city, Miyagi, 980-8574, Japan                                                                                                                  |
|                                                                                                                                                                     | Institutional Review Board, Tottori University Hospital, 36-1, Nishi-cho, Yonago-City, Tottori, 683-8504, Japan                                                                                                                           |
|                                                                                                                                                                     | Iwate Medical University Hospital Institutional Review Board, 19-1, Uchimaru, Morioka-city, Iwate, 020-8505, Japan                                                                                                                        |
|                                                                                                                                                                     | National Hospital Organization Kure Medical Center and Chugoku Cancer Center Institutional Review Board, 3-1, Aoyama-cho, Kure-city, Hiroshima, 737-0023, Japan                                                                           |
| Norway                                                                                                                                                              | Regional komite for medisinsk og helsefaglig forskningsetikk, Sor-Ost-Norge (REK Sor-Ost), Pb. 1130 Blindern, Oslo, 03180,Norway                                                                                                          |
| Republic of Korea                                                                                                                                                   | Asan Medical Center Institutional Review Board, 388-1 Pungnap-2-Dong, Songpa-Gu, Seoul, 138-736, Korea                                                                                                                                    |
|                                                                                                                                                                     | Institutional Review Board of Samsung Medical Center, 50 Ilwon-Dong, Kangnam-Ku, Seoul, 135-710, Korea                                                                                                                                    |
|                                                                                                                                                                     | Institutional Review Board of Seoul National University Hospital, 28 Yungun-Dong Chongno-Ku, Seoul, 110-744, Korea                                                                                                                        |
|                                                                                                                                                                     | National Cancer Center Institutional Review Board, 809, Madu-dong, Ilsan-gu, Goyang-si, Gyeonggi-do, 410-769, Korea                                                                                                                       |
|                                                                                                                                                                     | Institutional Review Board of Kangnam Severance Hospital, 146-92, Dogok-Dong, Kangnam-Ku, Seoul, 135-702, Korea                                                                                                                           |
|                                                                                                                                                                     | Comite Etico de Investigacion Clinica (CEIC), Grupo Hospitales de Madrid, Avenida Castillo Olivares, s/n, Torreledones, Madrid, 28250, Spain                                                                                              |
|                                                                                                                                                                     | Comite Etico de Investigacion Clinica de Euskadi, Direccion de Farmacia, Departamento de Sanidad del Gobierno Vasco, C/ Donostia-San Sebastian, n0 1, Vitoria , 01010, Spain                                                              |
|                                                                                                                                                                     | Comite Etico de Investigacion Clinica, Arnau de Vilanova, Avenida Alcalde Rovira Roure, 80, Lérida, 25198, Spain                                                                                                                          |
|                                                                                                                                                                     | Comite Etico de Investigacion Clinica, Clinico de Santiago, Choupana s/n, Santiago de Compostela, 15706, Spain                                                                                                                            |
|                                                                                                                                                                     | Comite Etico de Investigacion Clinica, Corporació Sanitària Parc Taulí, C/Parc Taulí, s/n, Sabadell, 08208, Spain                                                                                                                         |
|                                                                                                                                                                     | Comite Etico de Investigacion Clinica, Fundació Hospital Alcorcón, Budapest, 1, Alcorcón (Madrid), 28922, Spain                                                                                                                           |
|                                                                                                                                                                     | Comite Etico de Investigacion Clinica, Hospital de Donosti, Paseo Dr. Beguiristain, 109, San Sebastián, 20014, Spain                                                                                                                      |
|                                                                                                                                                                     | Comite Etico de Investigacion Clinica, Hospital de Navarra, Irunlarrea, 3, Pamplona, 31008, Spain                                                                                                                                         |
|                                                                                                                                                                     | Comite Etico de Investigacion Clinica, Hospital de Terrassa, Carretera de Torrebónica s/n, Terrassa, Barcelona, 08227, Spain                                                                                                              |
|                                                                                                                                                                     | Comite Etico de Investigacion Clinica, Hospital del Mar, Paseo Marítimo, 25-29, Barcelona, 08003, Spain                                                                                                                                   |
| Comite Etico de Investigacion Clinica, Hospital General de Valencia, Avenida Tres Cruces s/nº, Valencia, 46014, Spain                                               |                                                                                                                                                                                                                                           |

|               |                                                                                                                                                                                                          |
|---------------|----------------------------------------------------------------------------------------------------------------------------------------------------------------------------------------------------------|
| <b>Spain</b>  | Comite Etico de Investigacion Clinica, Hospital Gregorio Marañón, C/ Dr. Esquerdo, 46, Madrid, 28007, Spain                                                                                              |
|               | Comite Etico de Investigacion Clinica, Hospital La Paz, Paseo de la Castellana, 261, Madrid, 28046, Spain                                                                                                |
|               | Comite Etico de Investigacion Clinica, Hospital Miguel Servet, Pº Isabel La Catolica 3, Zaragoza, 50009, Spain                                                                                           |
|               | Comite Etico de Investigacion Clinica, Hospital Ramon y Cajal, Ctra. Colmenar Viejo Km 9.1, Madrid, 28034, Spain                                                                                         |
|               | Comite Etico de Investigacion Clinica, Hospital Santa Creu i Sant Pau, Servicio de Hematologia, Avda. Sant Antoni Maria Claret, 167, Barcelona, 8025, Spain                                              |
|               | Comite Etico de Investigacion Clinica, Hospital Son Llatzer, Ctra. de Manacor, 4, Palma de Mallorca, 07198, Spain                                                                                        |
|               | Comite Etico de Investigacion Clinica, Hospital Universitario La Fe, Bulevar sur s/n, Valencia, 46026, Spain                                                                                             |
|               | Comite Etico de Investigacion Clinica, Hospital Vall d' Hebrón, Edificio Instituto Recerca 2ª planta, Paseo de la Vall d'Hebrón, 119-129, Barcelona, 08035, Spain                                        |
|               | Comite Etico de Investigacion Clinica, Hospital Virgen de la Arrixaca, Ctra. Madrid-Cartagena, s/n, Murcia (El Palmar), 30120, Spain                                                                     |
|               | Comite Etico de Investigacion Clinica, Hospital Virgen del Rosell, Paseo Alfonso XIII, 61, Cartagena, Murcia, 30203, Spain                                                                               |
|               | Comite Etico de Investigacion Clinica, Instituto Valenciano de Oncologia, C/ Profesor Beltrán Bágüena 11, 8 y 19, Valencia, 46009, Spain                                                                 |
|               | Comite Etico de Investigacion Clinica, Ruber Internacional, C/La Maso 38, Madrid, 28034, Spain                                                                                                           |
|               | Comite Etico de Investigacion Clinica, Ciutat Sanitaria y Universitaria de Bellvitge, Edificio de Consultas Externa, 1ª planta, C/Feixa, Llarga, s/n, L'Hospitalet de Llobregat, Barcelona, 08907, Spain |
|               | Hospital General de Elche, C/ Camí de la Almazara, Elche, 03203, Spain                                                                                                                                   |
|               | <b>Sweden</b>                                                                                                                                                                                            |
| <b>Taiwan</b> | Institution of Review Board, Mackay Memorial Hospital, No.92, Section 2, Chung-Shan North Road, Taipei, 104, Taiwan                                                                                      |
|               | Institution of Review Board, Taipei Veterans General Hospital, No.201, Section 2, Shih-Pai Road, Taipei, 112, Taiwan                                                                                     |
| <b>USA</b>    | Atlantic Health System Inc., Institutional Review Board, 475 South Street, Morristown, New Jersey, 07962, United States                                                                                  |
|               | City of Hope Institutional Review Board, 1500 East Duarte Road, Duarte, California, 91010-3000, United States                                                                                            |
|               | Columbia University Medical Center Institutional Review Board, 722 West 168 <sup>th</sup> Street, MSPH room 426, New York, 10032, United States                                                          |
|               | Committee on Human Research, University of California, San Francisco, Box 0962, 3333 California Street, Suite 315, San Francisco, California, 94143-0962, United States                                  |
|               | Human Subjects Review Committee, University of California, Davis CTSC Building, 2921 Stockton Boulevard, Suite 1400, Sacramento, California, 95817, United States                                        |
|               | Institutional Review Board at Montefiore, Office of Research and Sponsored Programs, 3308 Rochambeau Avenue, Bronx, New York, 10461, United States                                                       |
|               | Institutional Review Board, Kaiser Permanente Southern California, 393 East Walnut Street, 2nd Floor, Pasadena, California, 91188, United States                                                         |
|               | Kaiser Foundation Research Institute, Kaiser Permanente Northern California Institutional Review Board, 1800 Harrison Street, Oakland, 16th Floor, California, 94612-3433, United States                 |
|               | Long Beach Memorial Medical Center, Memorial Health Service Research Council, 2801 Atlantic Avenue, Long Beach, California, 90801, United States                                                         |
|               | Office of Research Integrity and Assurance, 407 East 61 <sup>st</sup> Street, 1 <sup>st</sup> Floor, New York, 10065, United States                                                                      |
|               | Office of Research, 5171 California Avenue, Suite 150, Irvine, California, 92697-7600, United States                                                                                                     |
|               | Office of the Human Research Protection Program, University of California-Los Angeles, 11000 Kinross Avenue, Suite 102, Box 951694, Los Angeles, California, 90095-1694, United States                   |
|               | Georgia Regents University Institutional Review Board, Georgia health Sciences University, Human Assurance Committee, 1120 15 <sup>th</sup> Street, CJ-2103, Augusta, Georgia, 30912-7621, United States |
|               | The University of Texas M.D. Anderson Cancer Center Surveillance Committee -FWA 363, 1515 Holcombe Boulevard, Unit 198, Houston, Texas, 77030-4009, United States                                        |
|               | Western Institutional Review Board, 3535 Seventh Avenue Southwest, Olympia, Washington, 98502, United States                                                                                             |
